# Supplementary material
Source: Springer Nature journal article supplement (https://www.springermedizin.de/resource/supplementary/13051_2010_187_MOESM6_ESM.pdf/9670122)

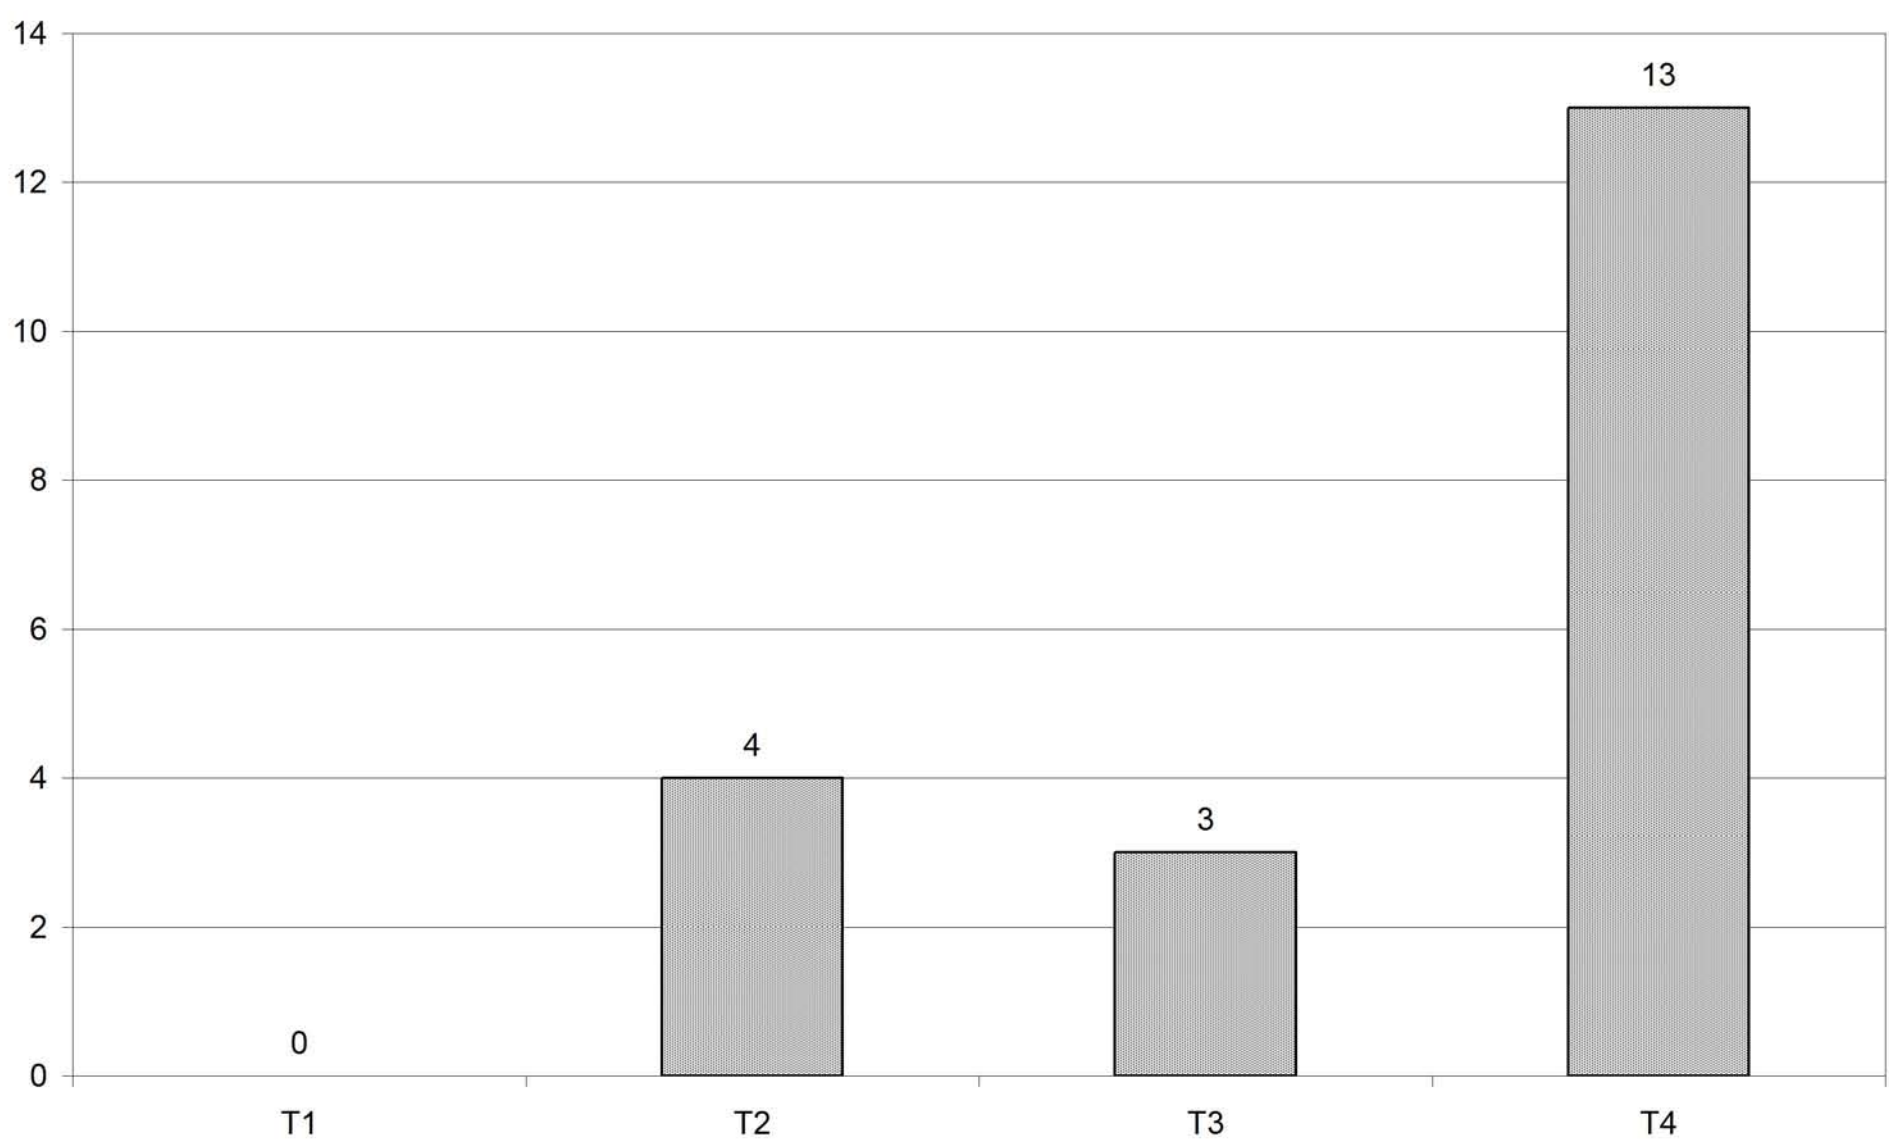

Supplement: MOESM6 [file 9670122]
